# Supplementary material
Source: MDPI journal article supplement (https://www.mdpi.com/2073-4395/10/12/1859)
Supplement: s1 [file s1]

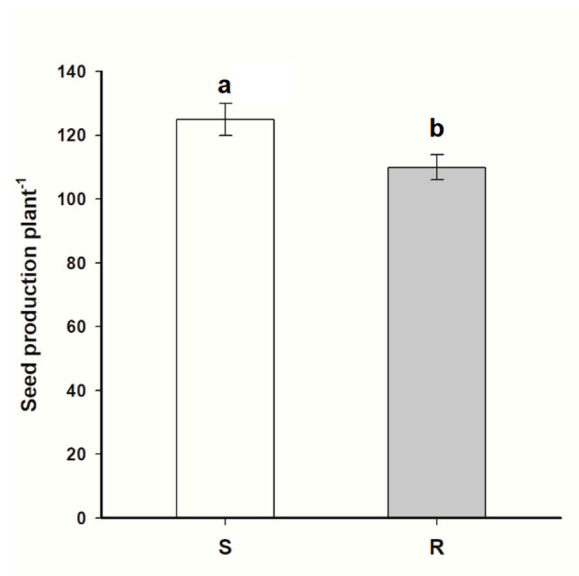

**Figure S1.** Average of seeds produced per plant in imazamox-susceptible (A) and -resistant (B) wild poinsettia plants. Same letters within each bar did not differ statistically at the 95% LSD test. Vertical bars  $\pm$  standard error ( $n=30$ ).
